# Supplementary material for: Causal relationship between oral/gut microbiota and lung cancer: a two-sample Mendelian randomization study
Source: Research Square preprint supplement (doi:10.21203/rs.3.rs-7222084/v1), 2025-08-12

Figure S2 Scatter plots of trends in the results of MR analysis of the relationship between oral/gut microbiota and lung cancer.

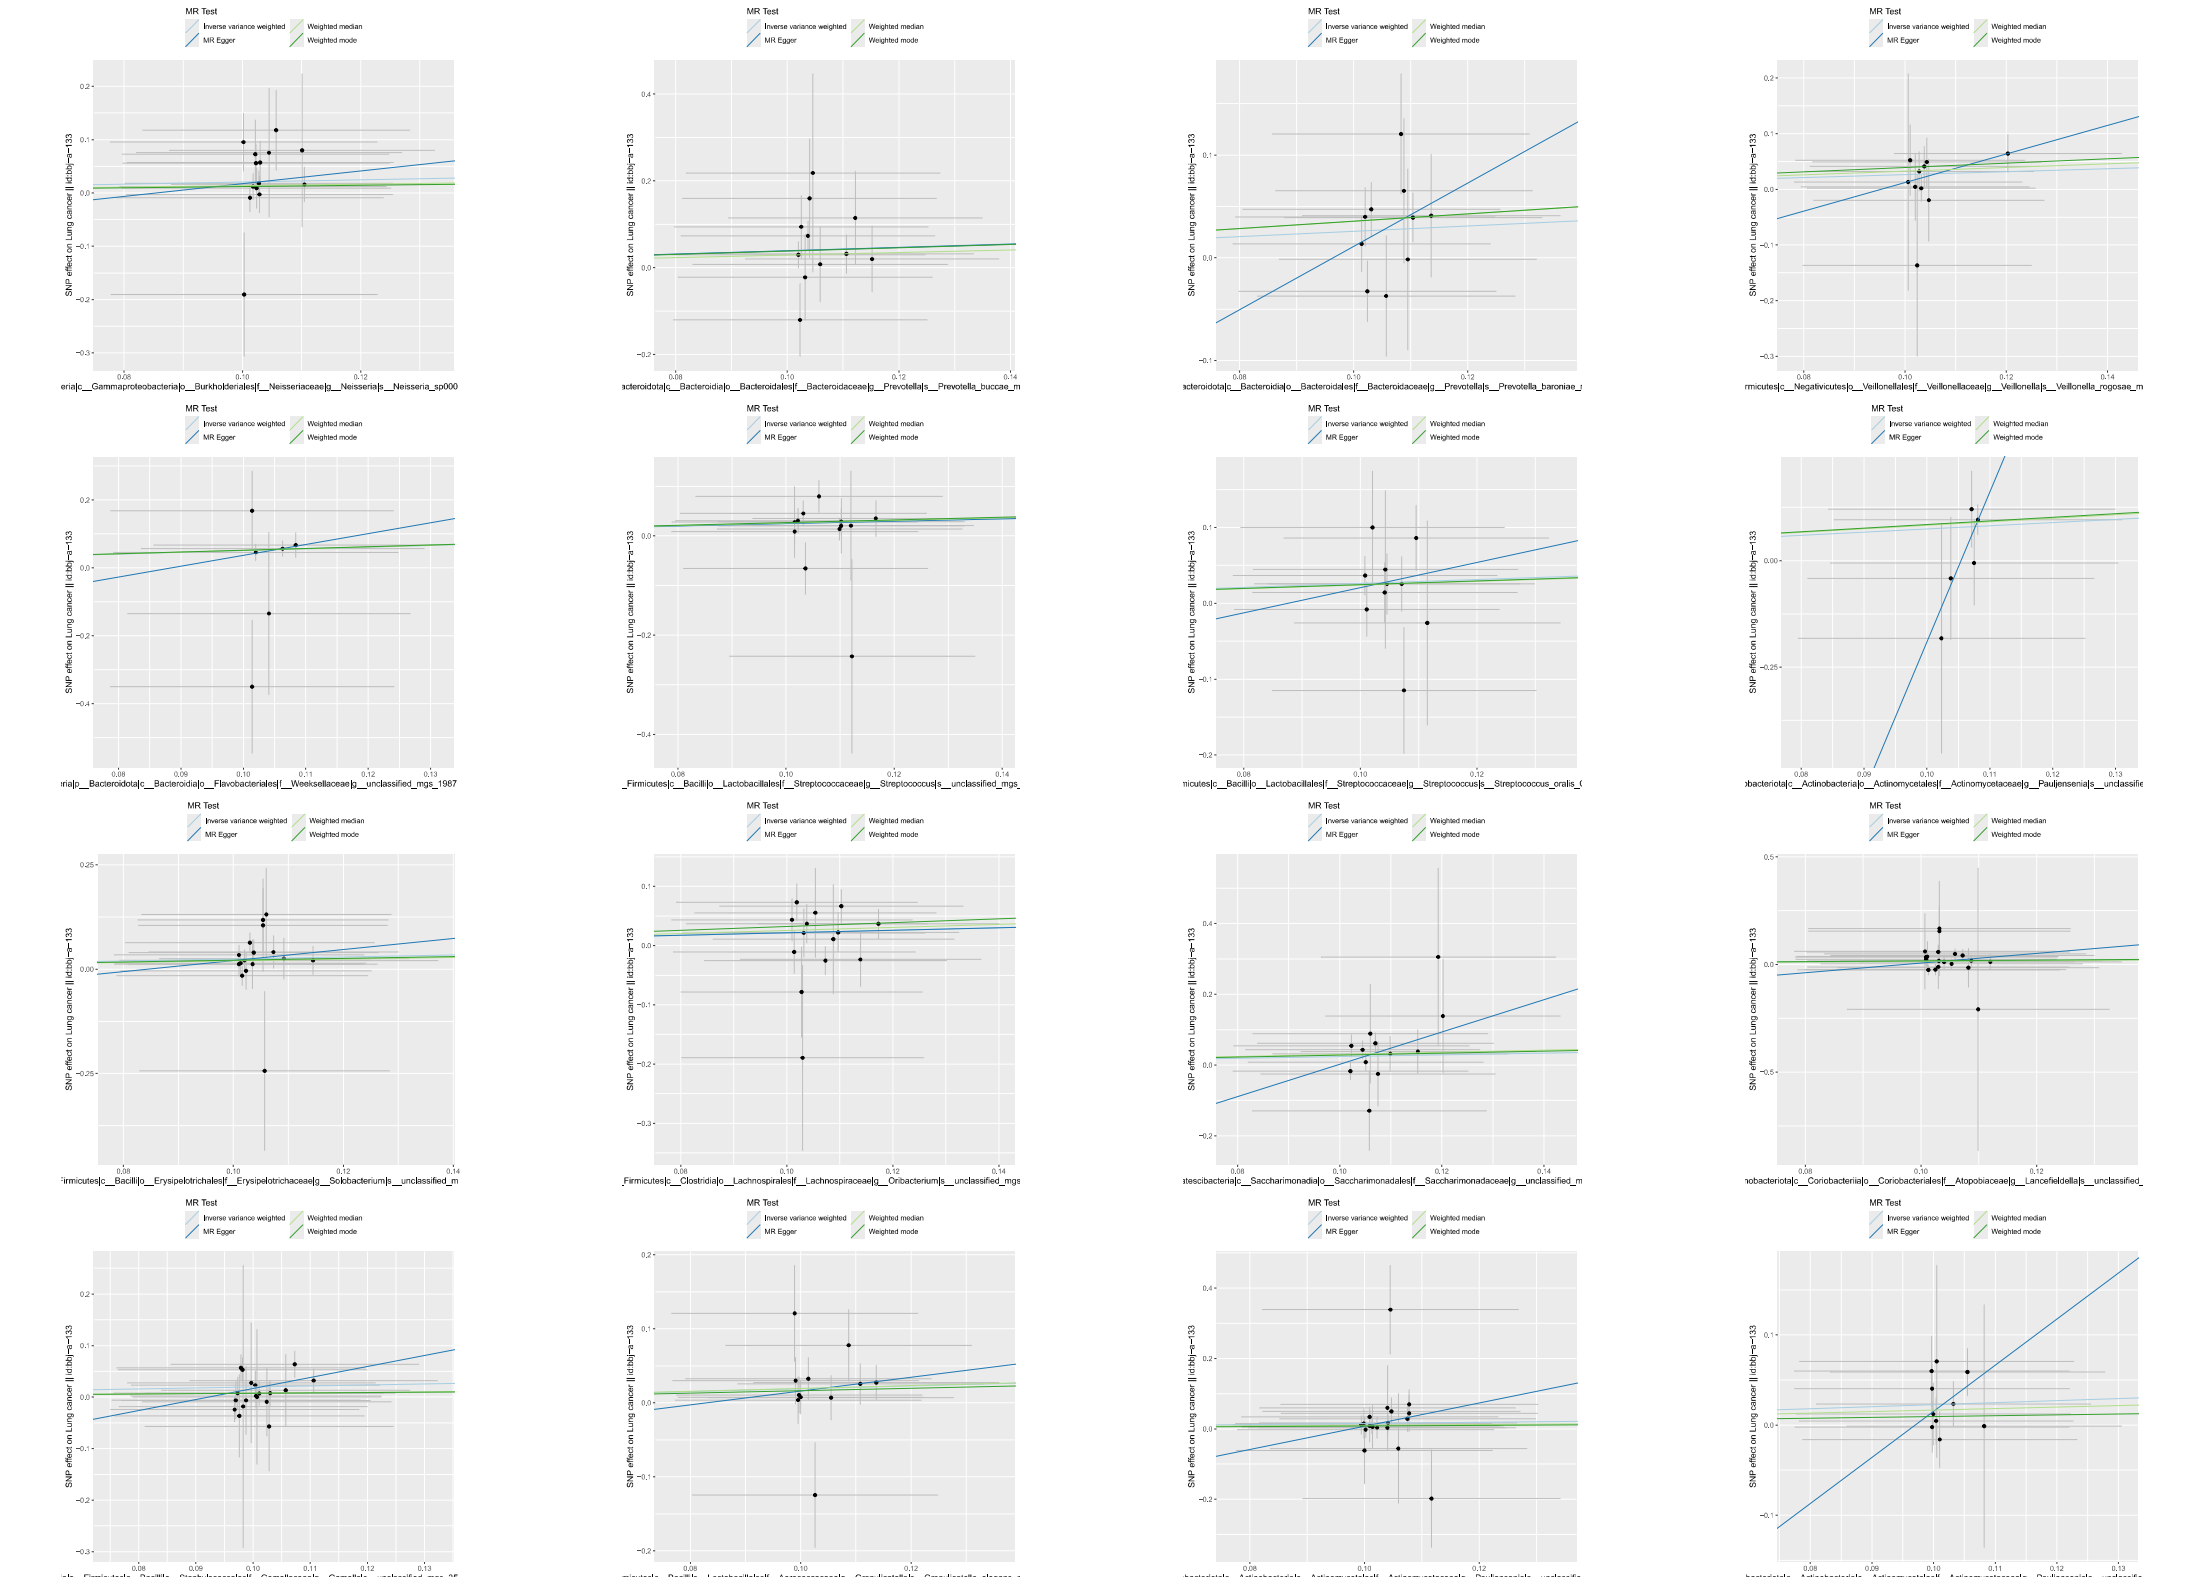

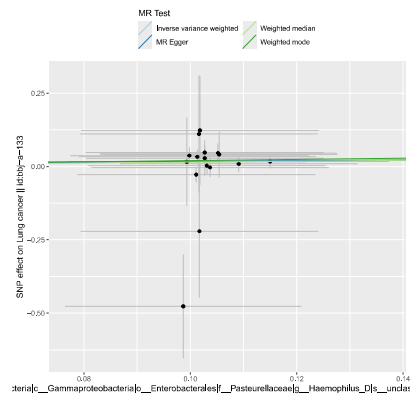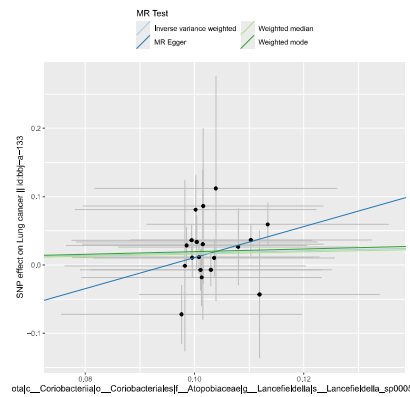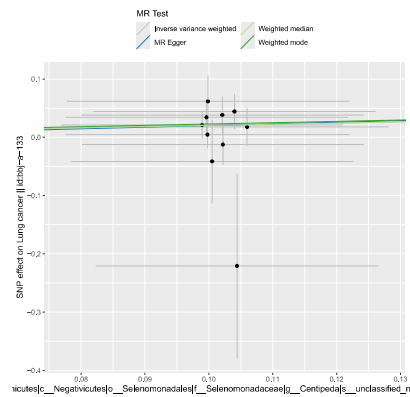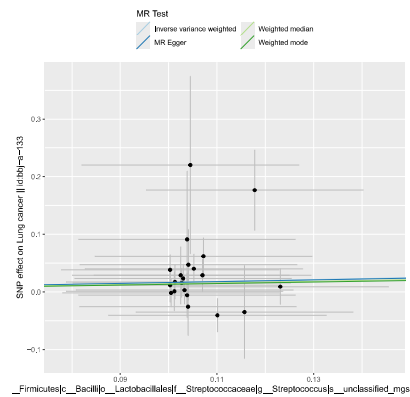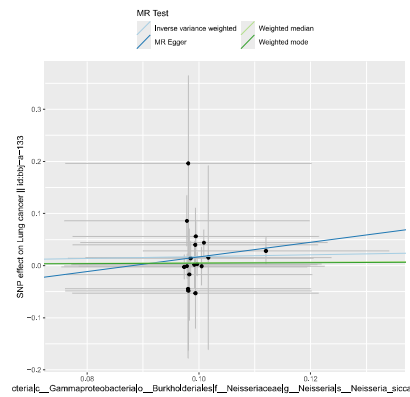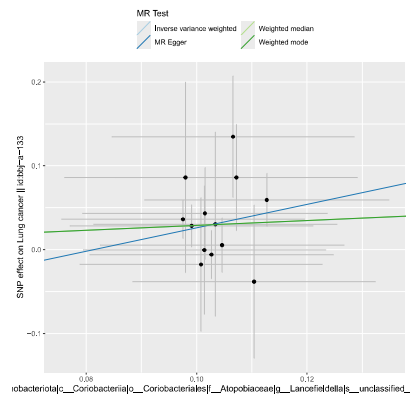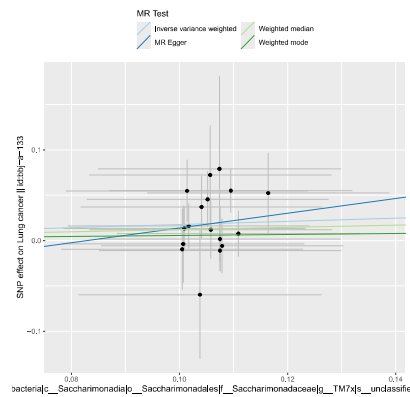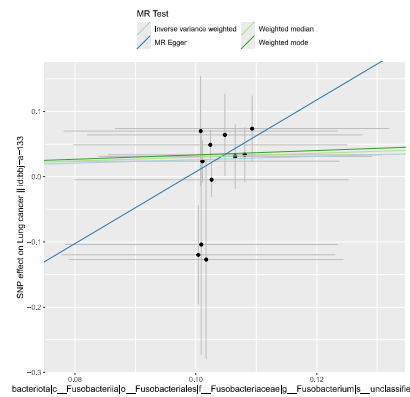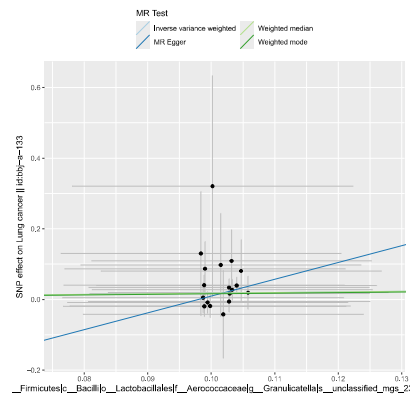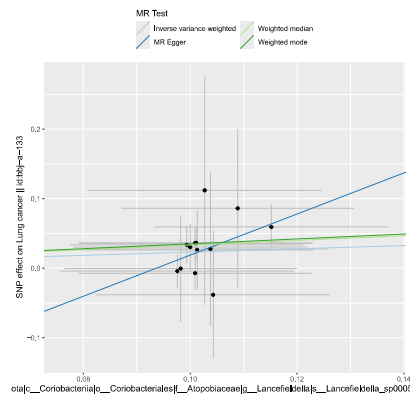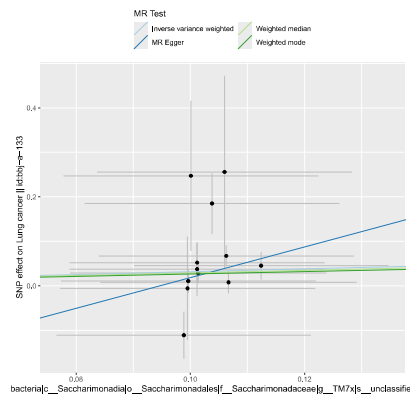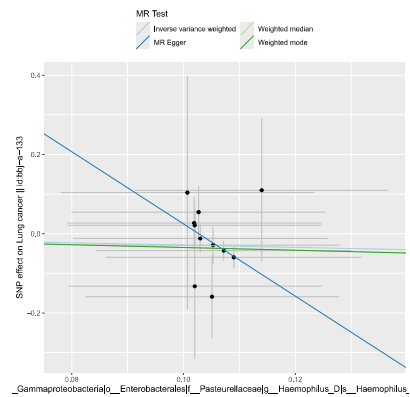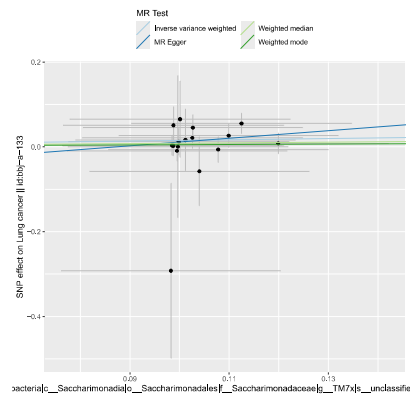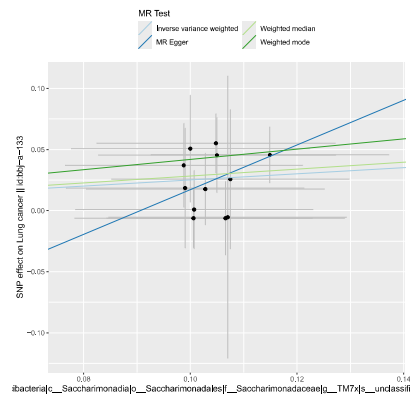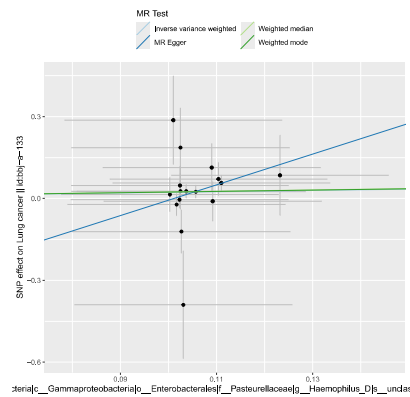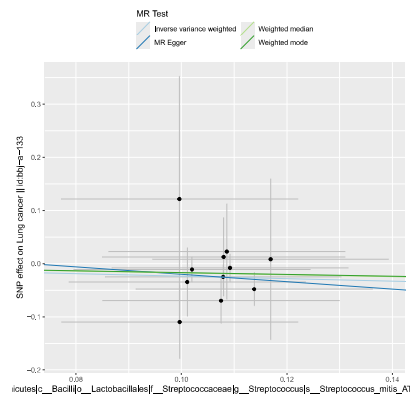

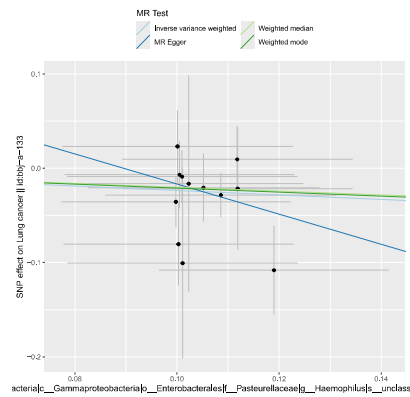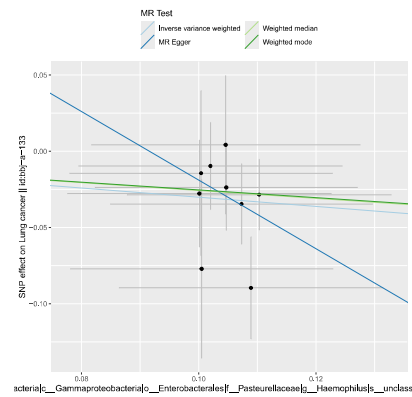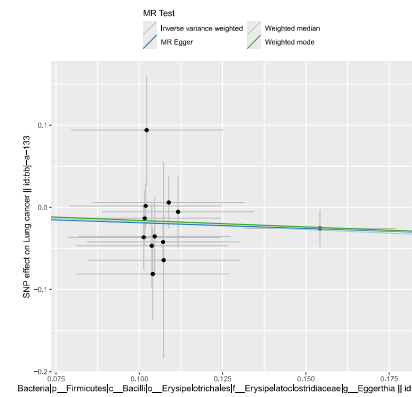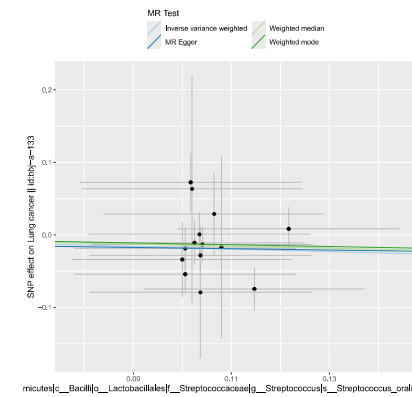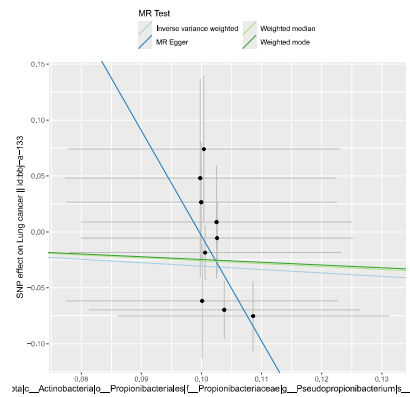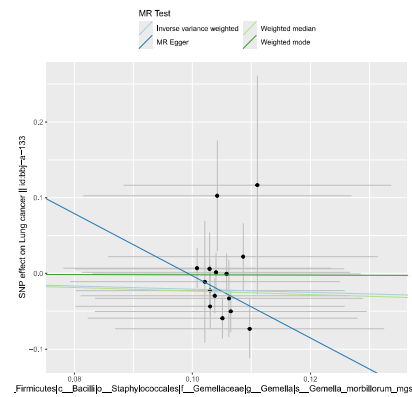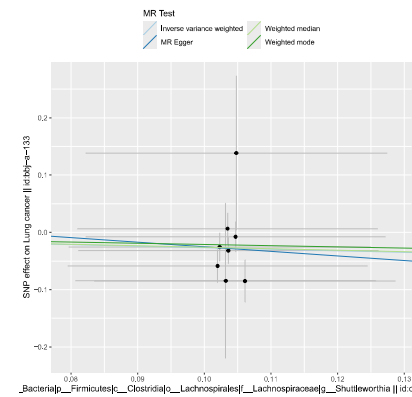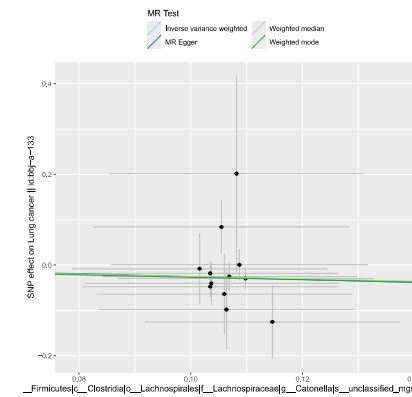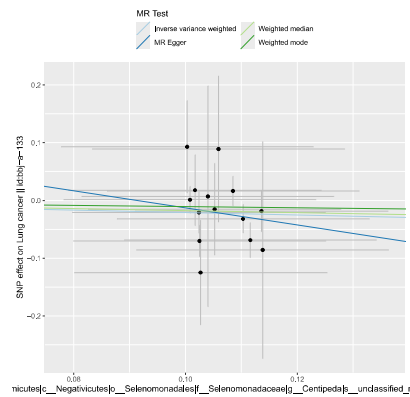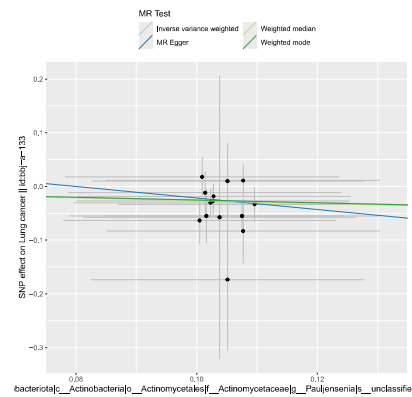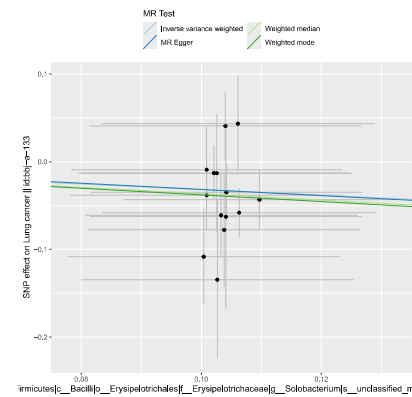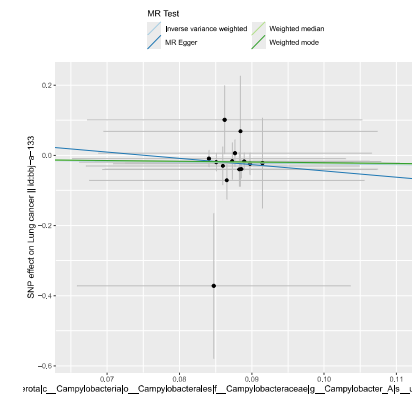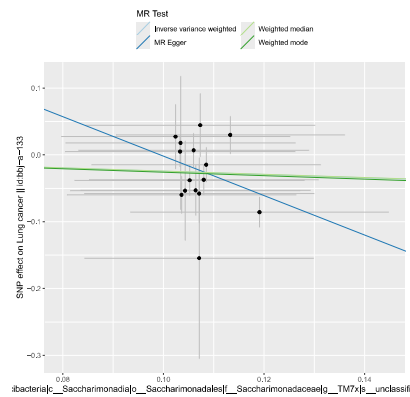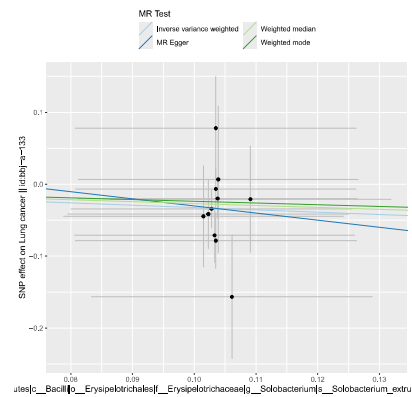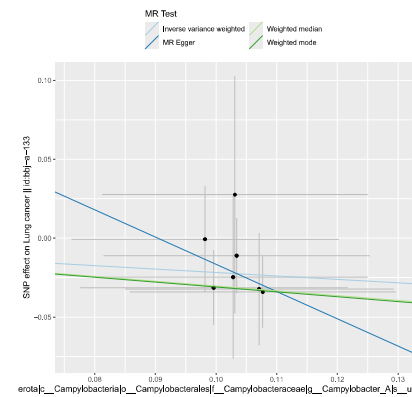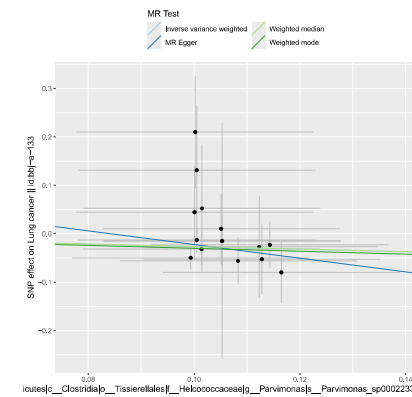

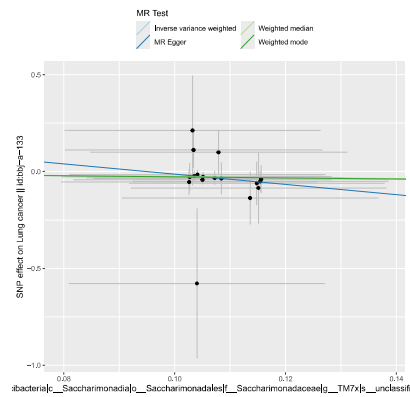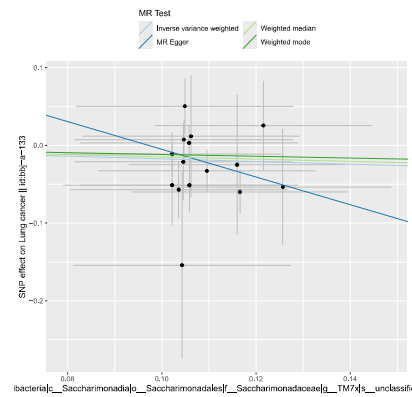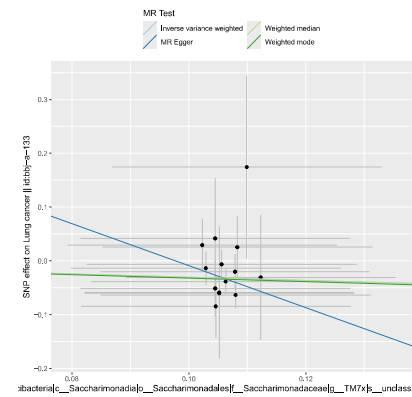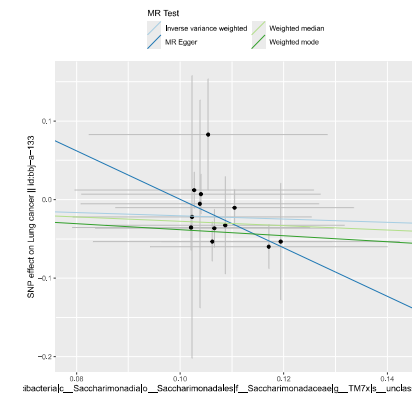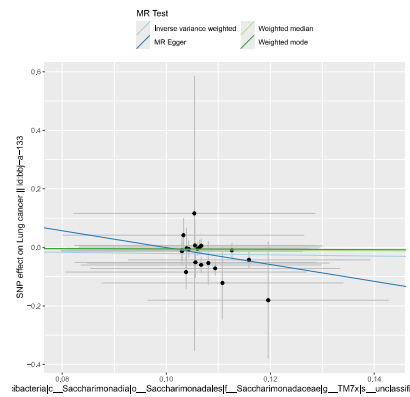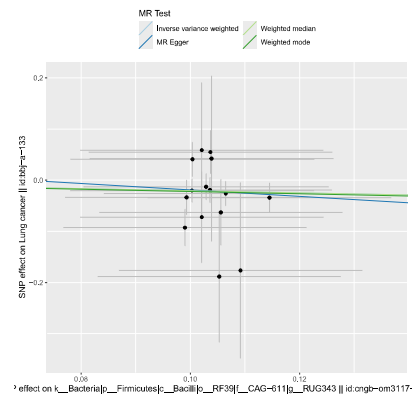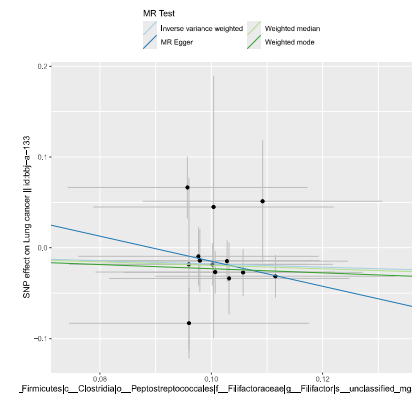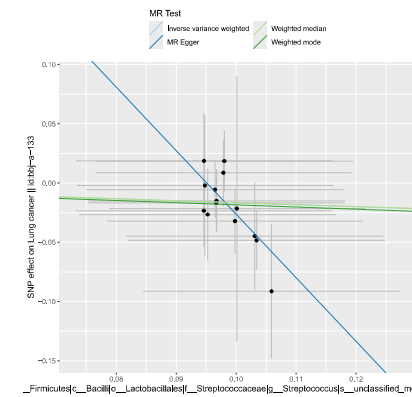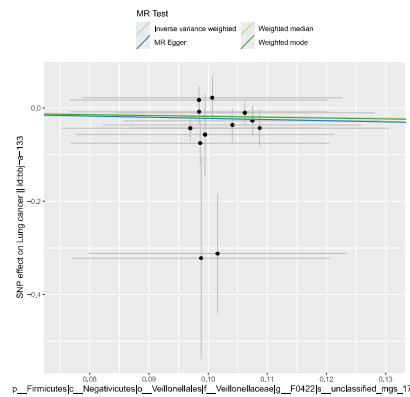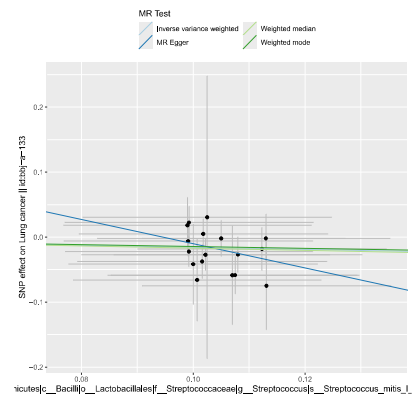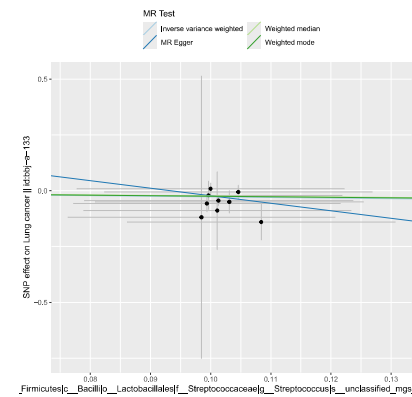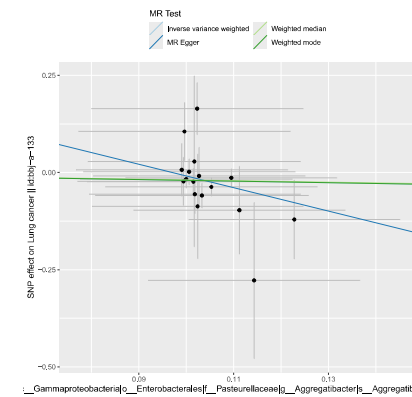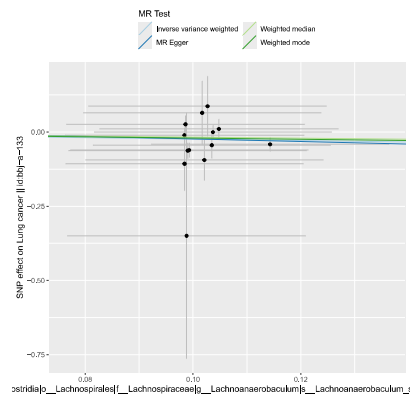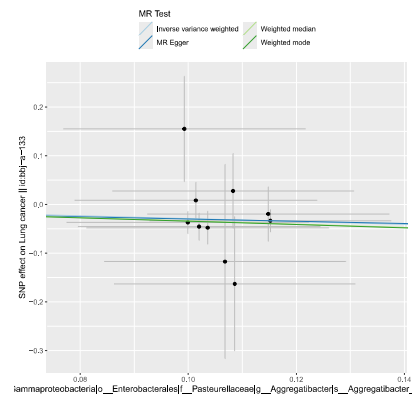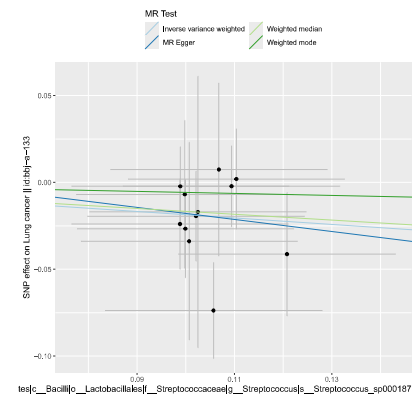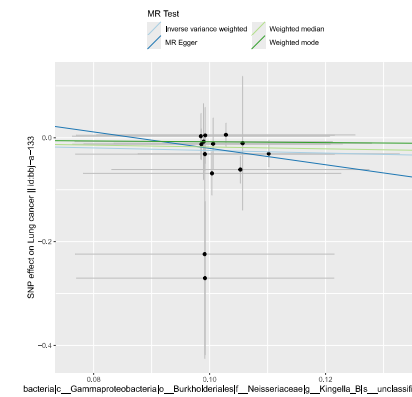

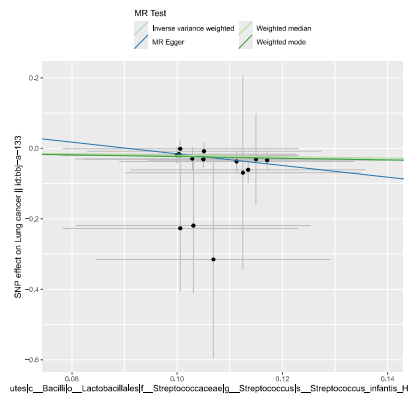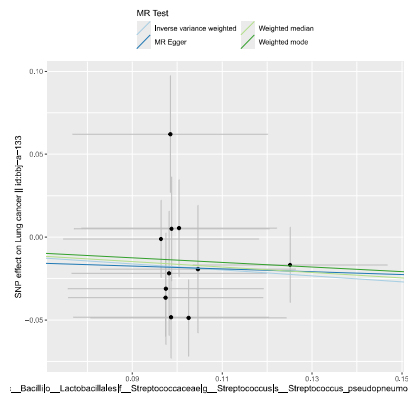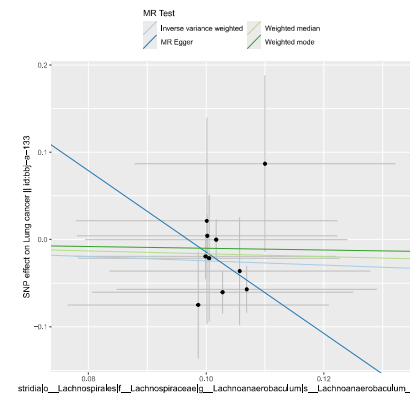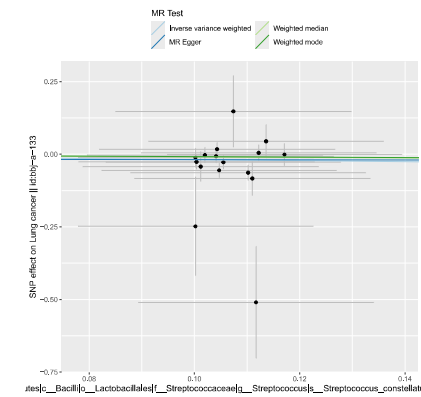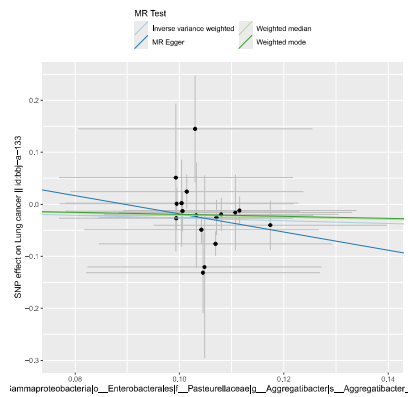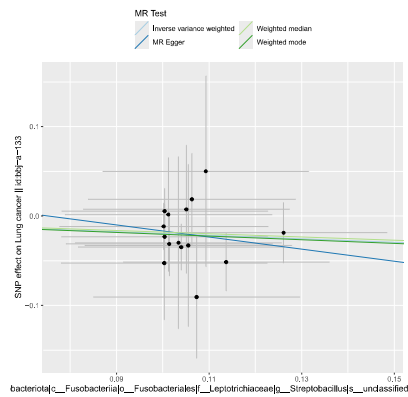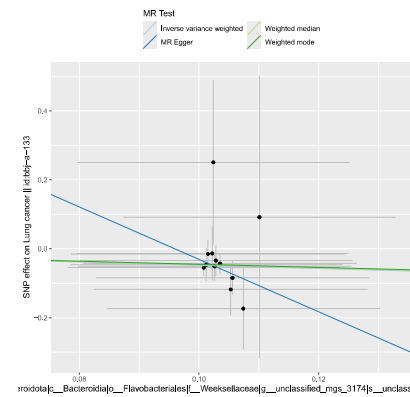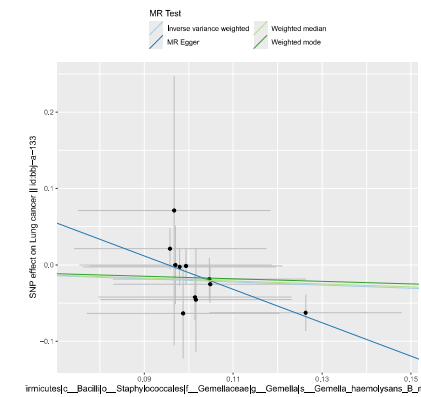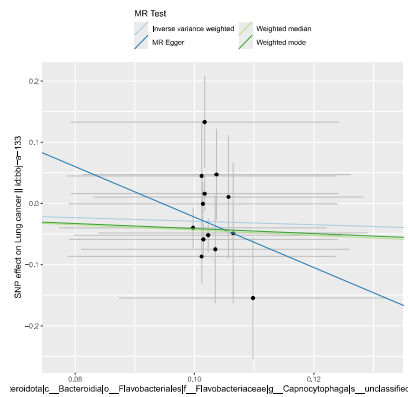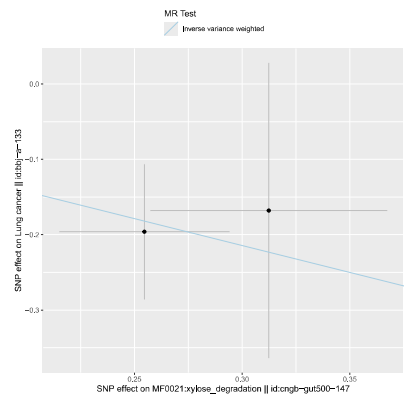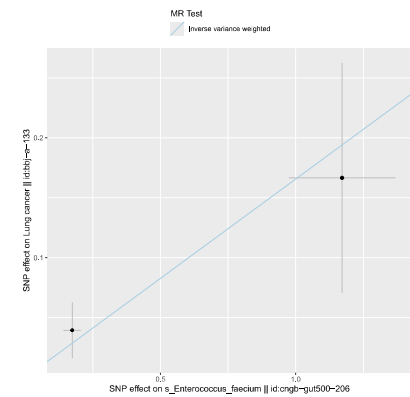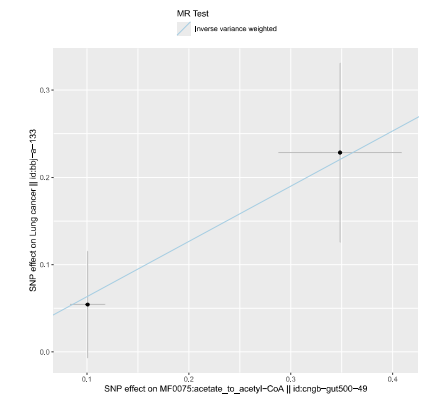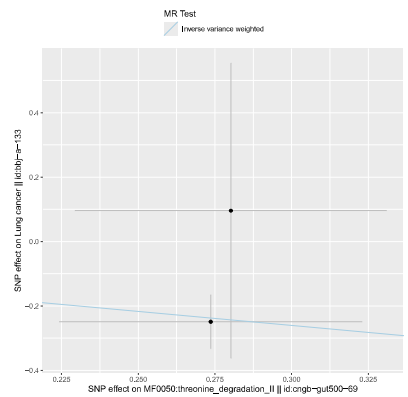

Supplement: Supplementary file 2 [file dca5f8d7e44896bdc3ddbc62.pdf]
