# Supplementary material for: Causal relationship between oral/gut microbiota and lung cancer: a two-sample Mendelian randomization study
Source: Research Square preprint supplement (doi:10.21203/rs.3.rs-7222084/v1), 2025-08-12
Supplement: Supplementary file 1 [file 75bcfa668cc3f1902205a587.pdf]

Figure S1 Leave one out sensitivity-analysis plots of the relationship between oral/gut microbiota and lung cancer.

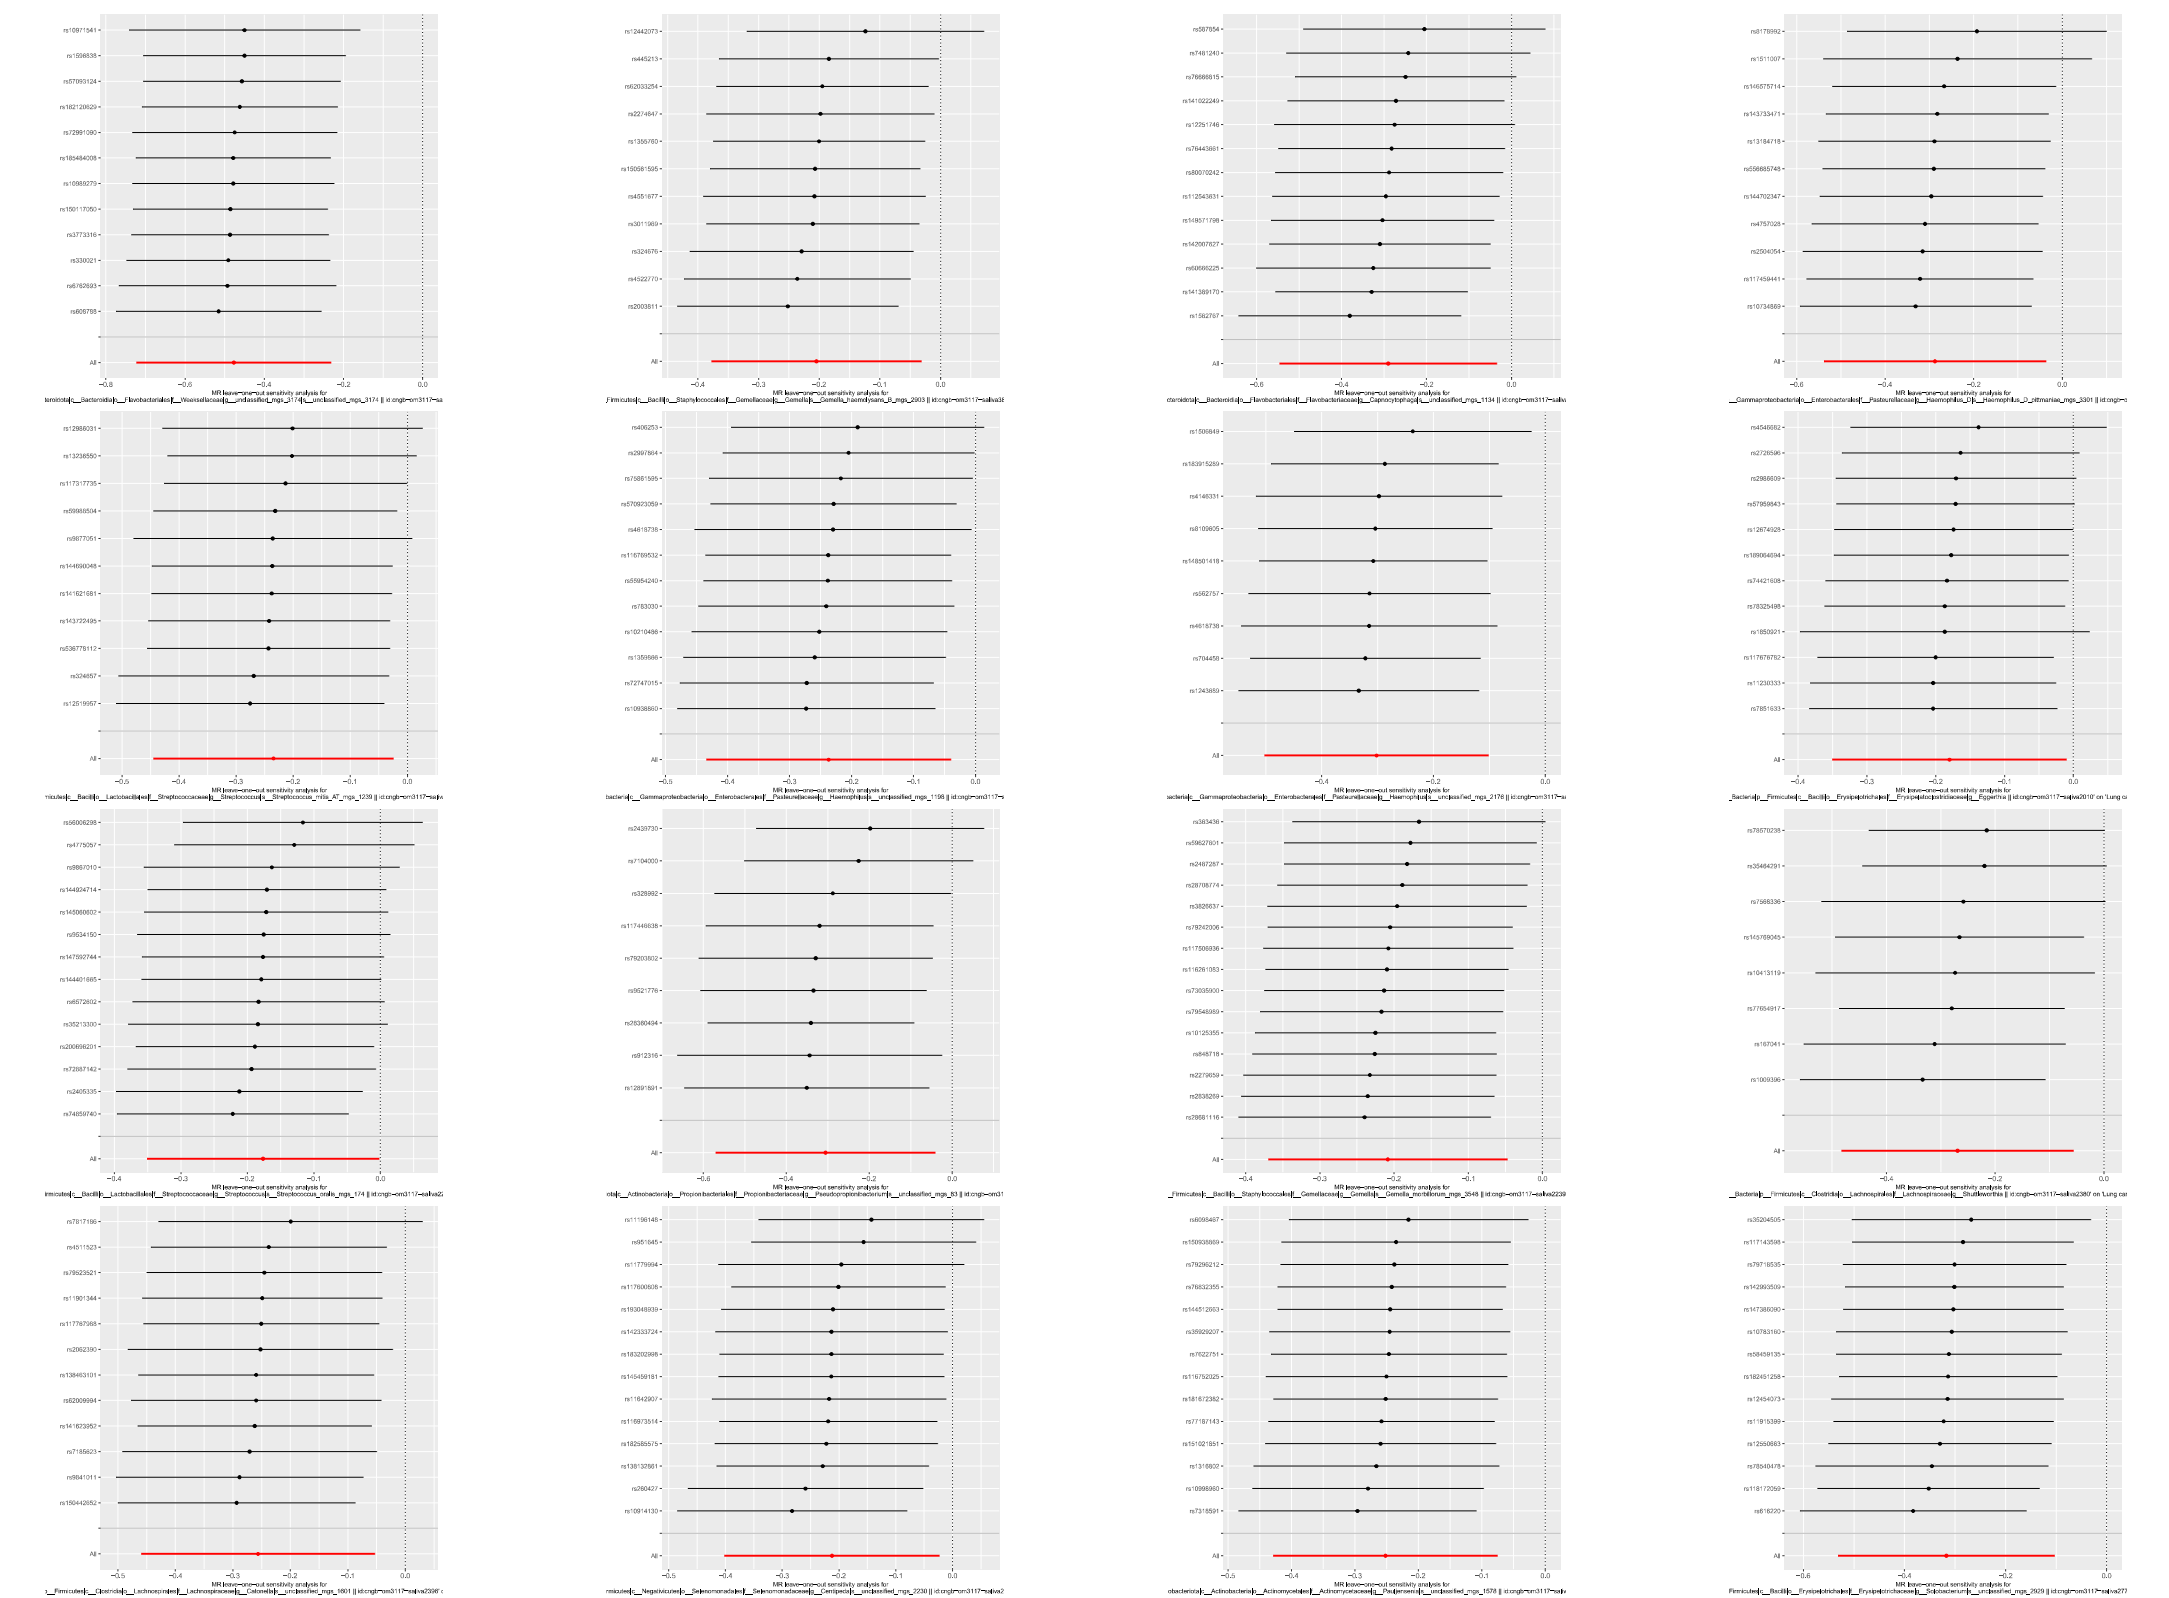

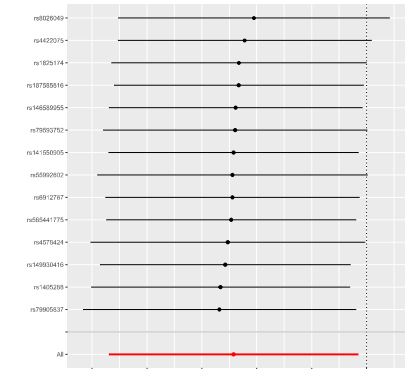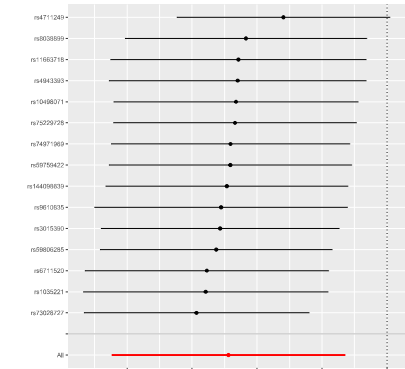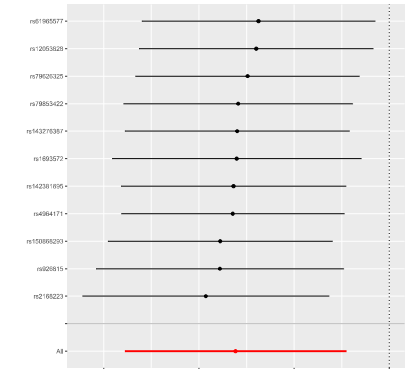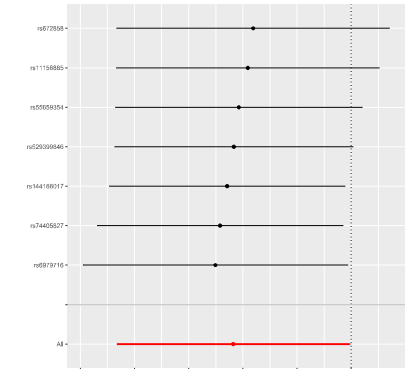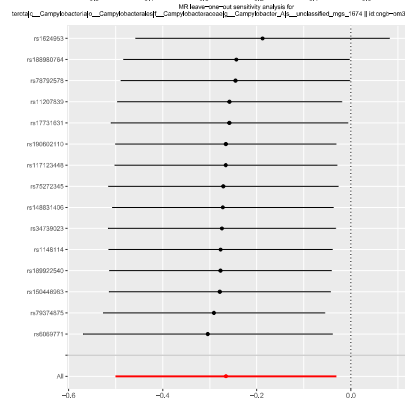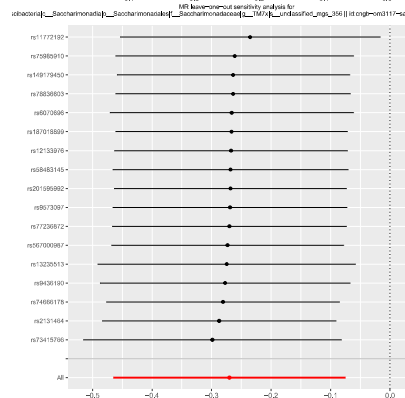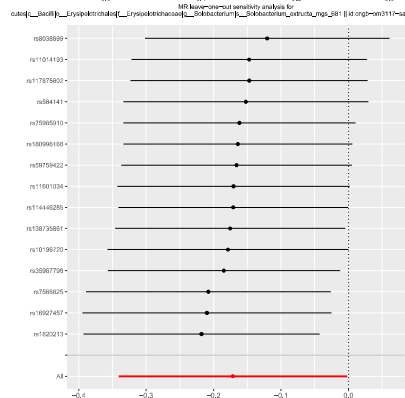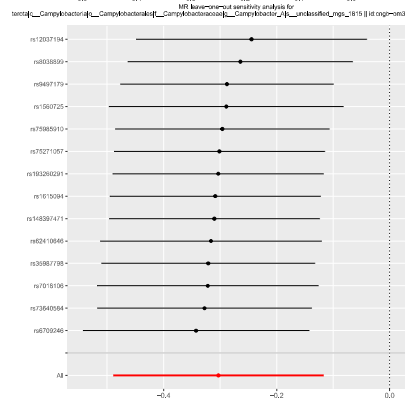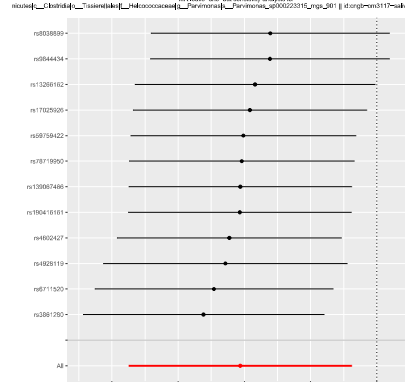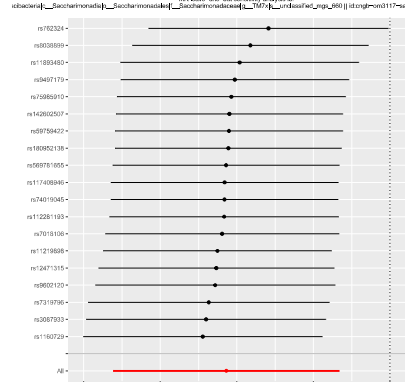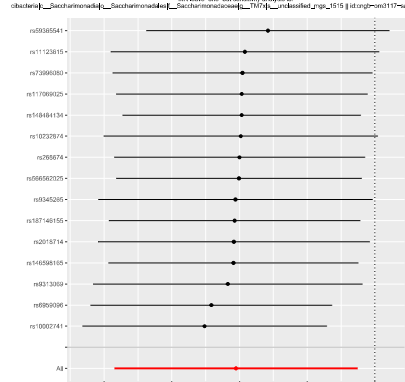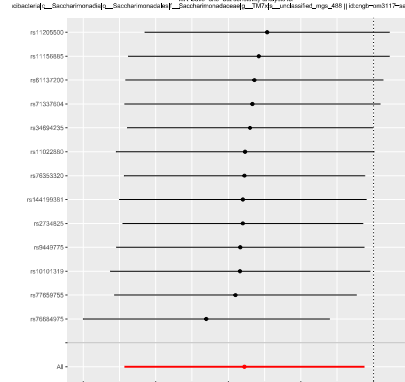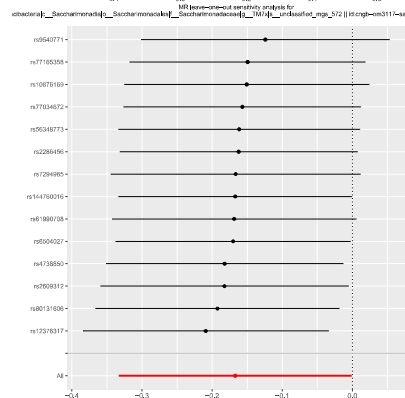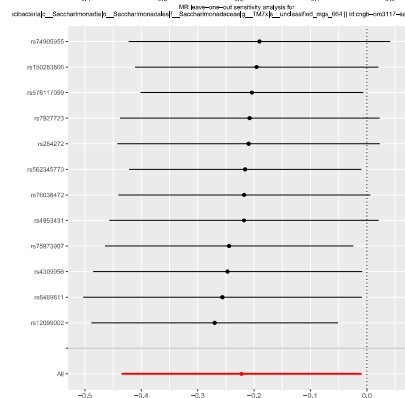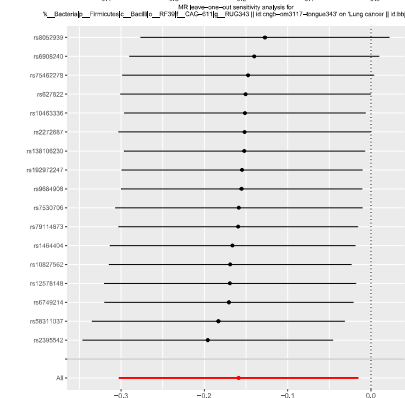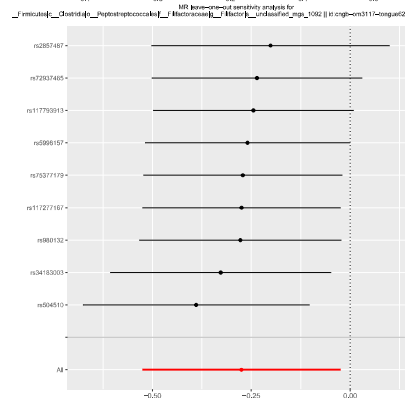



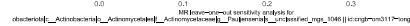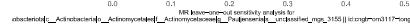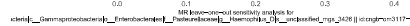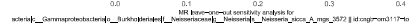

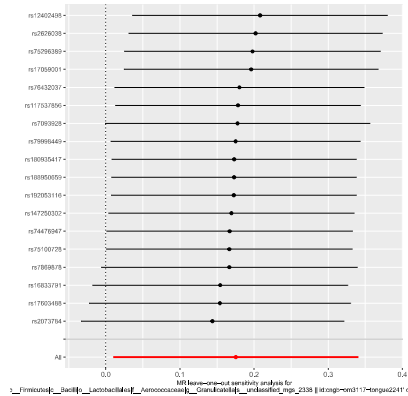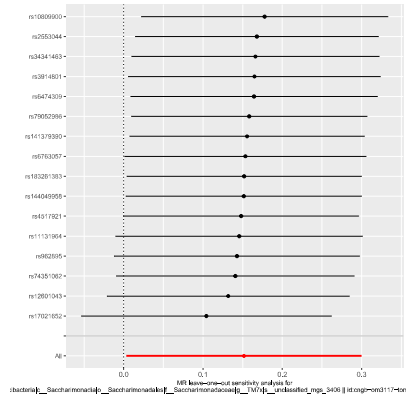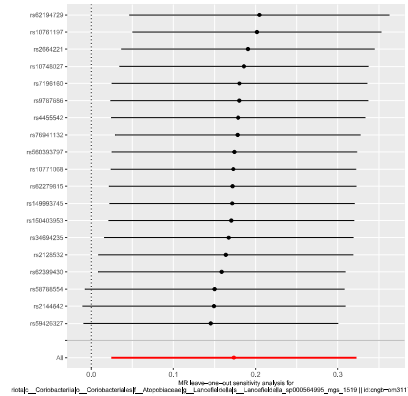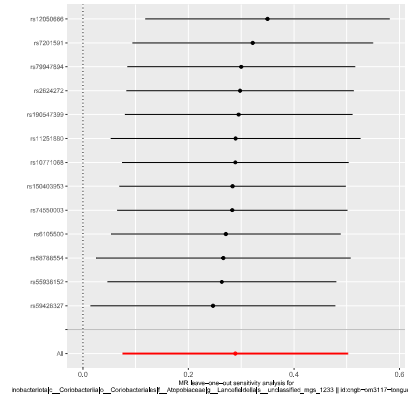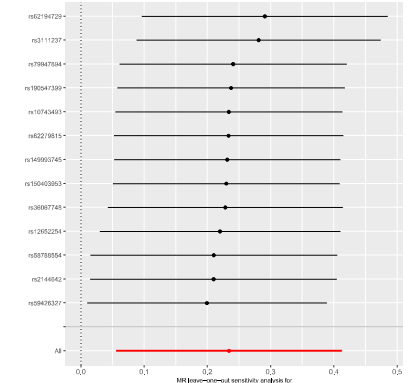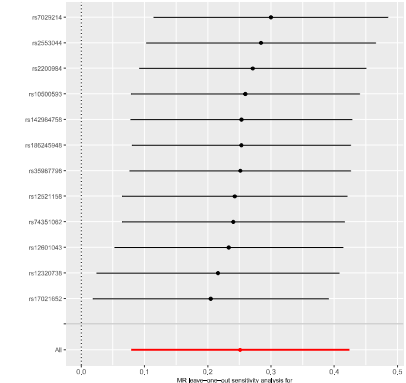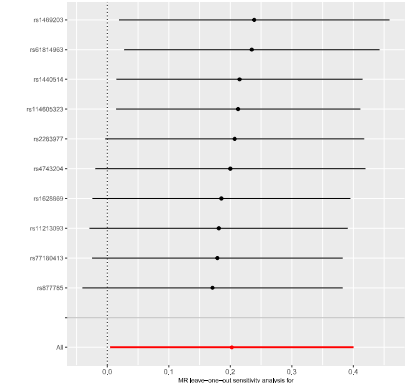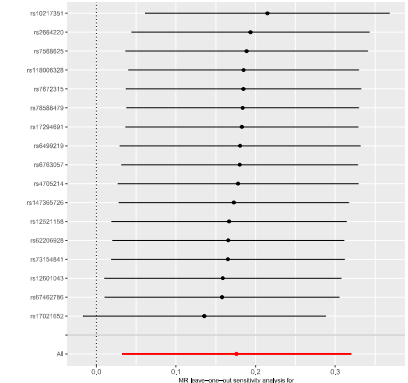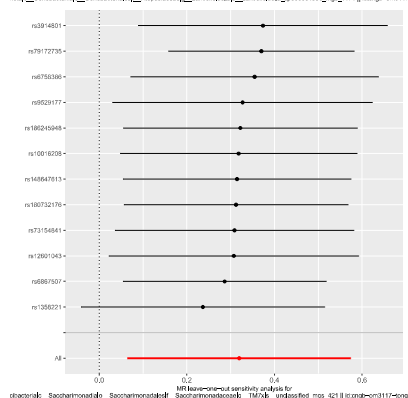

Forest plot showing the association of rs3814801 with the outcome. The plot displays a point estimate (black dot) and a 95% confidence interval (horizontal line). The x-axis represents the odds ratio (OR) on a log scale, ranging from 0.0 to 0.6. A vertical dashed line indicates the null value (OR = 1.0). A red horizontal line at the bottom indicates the overall pooled effect size.
